# Supplementary material for: Enveloping a Si/N-doped carbon composite in a CNT-reinforced fibrous network as flexible anodes for high performance lithium-ion batteries
Source: Royal Society of Chemistry journal article supplement (doi:10.1039/d1qi00708d), 2021-01-01
Supplement: d1qi00708d1.pdf [file d1qi00708d1.pdf]

## **Supporting information**

### **Enveloping Si/N-doped carbon composite in CNTs reinforced fibrous network as flexible anodes for high performance lithium ion batteries**

Xiangzhong Kong<sup>a,\*</sup>, Shi Luo<sup>a</sup>, Liya Rong<sup>a</sup>, Xuefang Xie<sup>b</sup>, Shuang Zhou<sup>b</sup>, Ziqiang Chen<sup>a</sup>, Anqiang Pan<sup>b,\*</sup>

<sup>a</sup> College of Mechanical Engineering, Hunan Institute of Science and Technology, Yueyang, 414006, China

<sup>b</sup> School of Materials Science & Engineering, Central South University, Changsha, 410083, China

\* Corresponding author: xzhkong@hotmail.com, pananqiang@csu.edu.cn

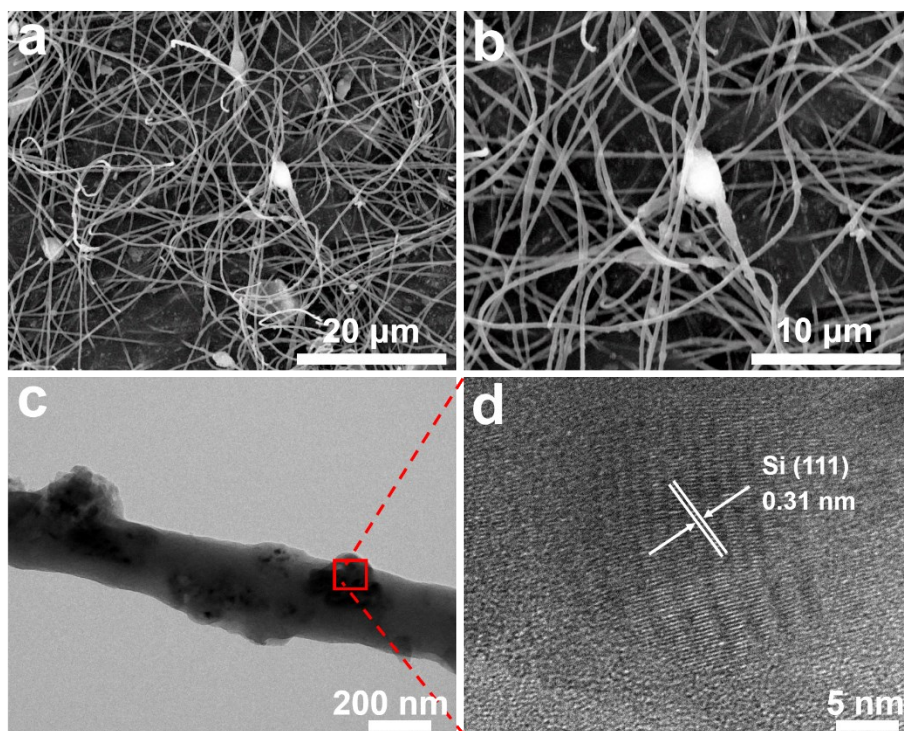

**Figure S1.** SEM and TEM images of the C/Si.

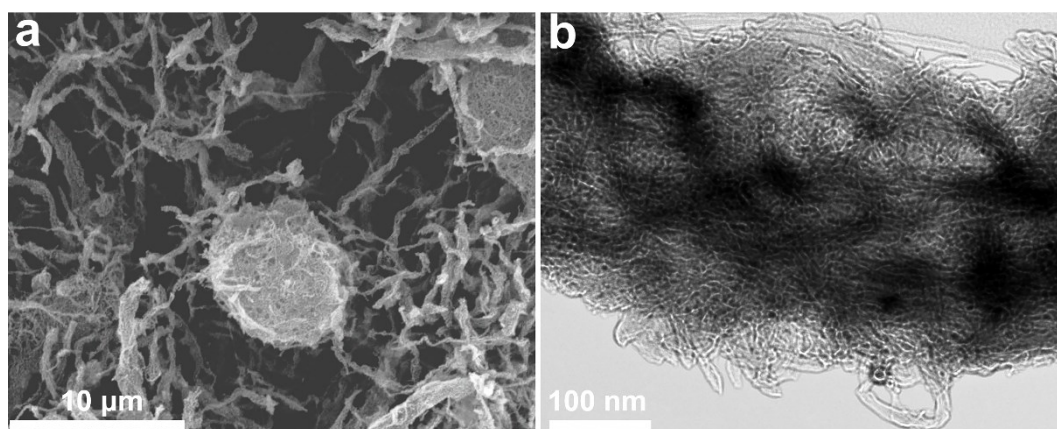

**Figure S2.** SEM and TEM images of the C/CNTs.

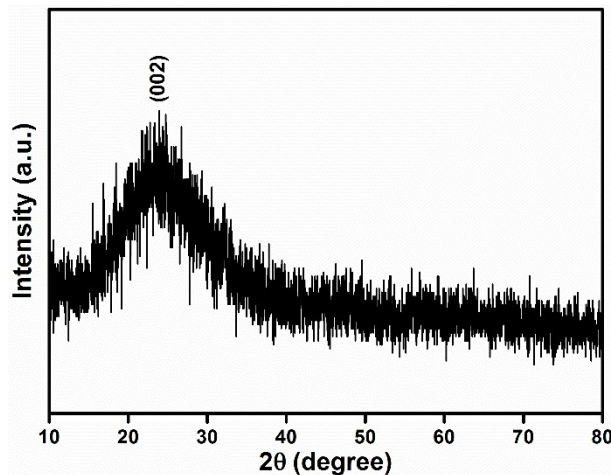

**Figure S3.** The XRD patterns of the C/CNTs.

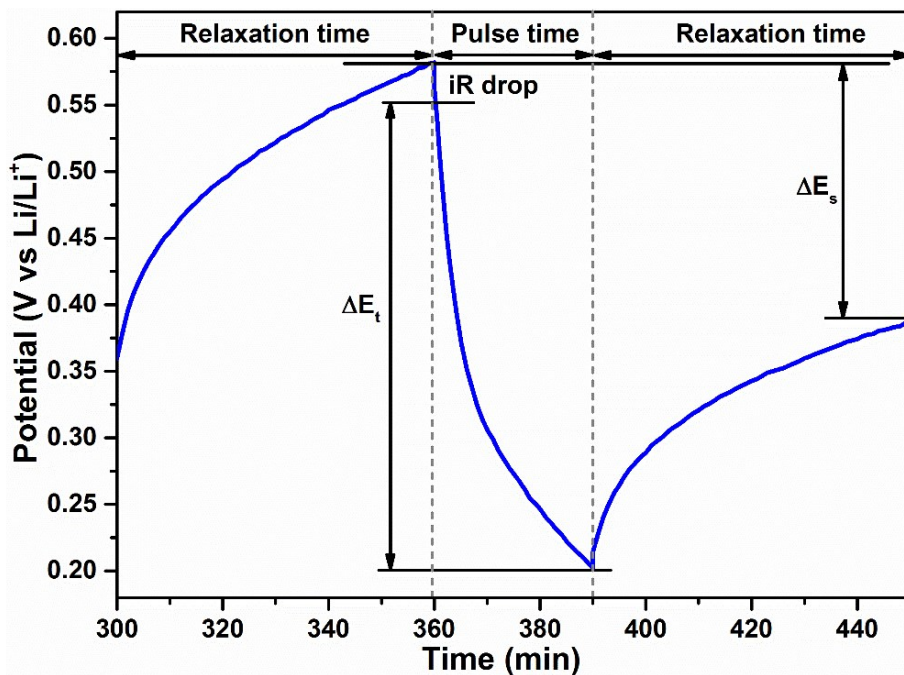

**Figure S4.** The E vs. t profile of the C/Si/CNTs electrode for a single GITT during discharge process, which is composed of 30 min galvanostatic charge (pulse) at 100 mA g<sup>-1</sup> followed by 60 min relaxation time. The iR drop is shown along with the  $\Delta E_s$  and  $\Delta E_t$ .

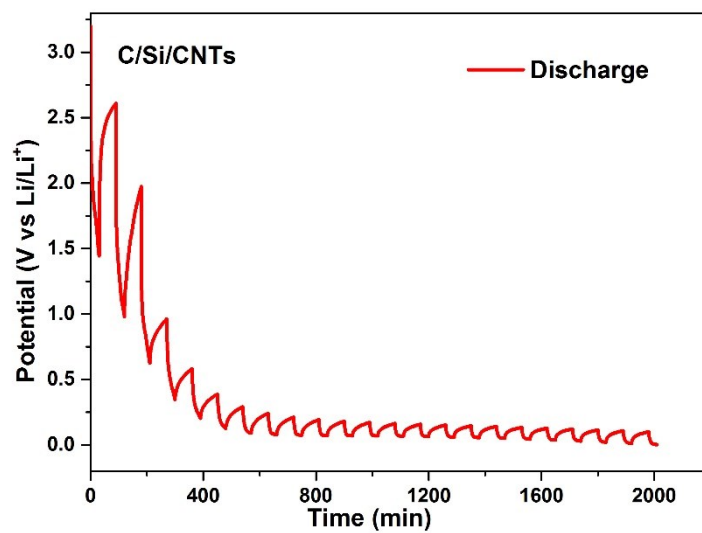

**Figure S5.** The corresponding discharge curves of the C/Si/CNTs for GITT test.
